# Supplementary material for: Mononuclear Copper(I) 3-(2-pyridyl)pyrazole Complexes: The Crucial Role of Phosphine on Photoluminescence
Source: MDPI journal article supplement (doi:10.3390/molecules26226869), 2021-11-14
Supplement: s1 [file s1]

## Supporting Information for

### **Mononuclear copper(I) 3-(2-pyridyl)pyrazole complexes: the crucial role of phosphine on photoluminescence**

Kristina F. Baranova <sup>1,2</sup>, Aleksei A. Titov <sup>1\*</sup>, Alexander F. Smol'yakov <sup>1,3</sup>, Andrey Yu. Chernyadyev <sup>4</sup>, Oleg A. Filippov <sup>1\*</sup> and Elena S. Shubina<sup>1</sup>

<sup>1</sup> A. N. Nesmeyanov Institute of Organoelement Compounds, Russian Academy of Sciences, Vavilov Str., 28,

119991 Moscow, Russia; krisbar99@gmail.com (K.F.B.); tit@ineos.ac.ru (A.A.T.); h-bond@ineos.ac.ru (O.A.F.);

rengenhik@gmail.com (A.F.S.), shu@ineos.ac.ru (E.S.S.);

<sup>2</sup> Faculty of Chemistry, Lomonosov Moscow State University, 1-3 Leninskie Gory, 119991 Moscow, Russia krisbar99@gmail.com (K.F.B.);

<sup>3</sup> Plekhanov Russian University of Economics, Stremyanny per. 36, Moscow, 117997, Russia; rengenhik@gmail.com (A.F.S.)

<sup>4</sup> A. N. Frumkin Institute of Physical Chemistry and Electrochemistry, Russian Academy of Sciences,

Leninsky prosp. 31/4, 199071 Moscow, Russia; chernyadyev@mail.ru (A. Y. C.);

\* Correspondence: tit@ineos.ac.ru (A.A.T.); h-bond@ineos.ac.ru (O.A.F.); Tel.: +7-499-135-1871

Table S1. Crystal data, data collection, and structure refinement parameters for **1-3** and **5**.

| Complex                                                      | 1                                                                                   | 2                                                                                | 3                                                                                | 5                                                                               |
|--------------------------------------------------------------|-------------------------------------------------------------------------------------|----------------------------------------------------------------------------------|----------------------------------------------------------------------------------|---------------------------------------------------------------------------------|
| Empirical formula                                            | C <sub>44.5</sub> H <sub>36</sub> BClCuF <sub>4</sub> N <sub>3</sub> P <sub>2</sub> | C <sub>53</sub> H <sub>43</sub> BCuF <sub>4</sub> N <sub>3</sub> OP <sub>2</sub> | C <sub>50</sub> H <sub>39</sub> BCuF <sub>4</sub> N <sub>3</sub> OP <sub>2</sub> | C <sub>58</sub> H <sub>43</sub> BCuF <sub>4</sub> N <sub>3</sub> P <sub>2</sub> |
| Formula weight                                               | 860.50                                                                              | 950.19                                                                           | 910.13                                                                           | 994.24                                                                          |
| Temperature/K                                                | 120                                                                                 | 120                                                                              | 120                                                                              | 100                                                                             |
| Crystal system                                               | triclinic                                                                           | monoclinic                                                                       | monoclinic                                                                       | triclinic                                                                       |
| Space group                                                  | <i>P</i> -1                                                                         | <i>P</i> 2 <sub>1</sub> /n                                                       | <i>P</i> 2 <sub>1</sub> /c                                                       | <i>P</i> -1                                                                     |
| <i>a</i> /Å                                                  | 10.511(2)                                                                           | 9.8935(5)                                                                        | 12.724(12)                                                                       | 11.9704(3)                                                                      |
| <i>b</i> /Å                                                  | 18.182(4)                                                                           | 22.2115(11)                                                                      | 18.596(16)                                                                       | 13.4472(3)                                                                      |
| <i>c</i> /Å                                                  | 24.983(5)                                                                           | 20.8288(11)                                                                      | 21.213(17)                                                                       | 15.8231(3)                                                                      |
| <i>α</i> /°                                                  | 100.721(5)                                                                          | 90                                                                               | 90                                                                               | 91.1990(10)                                                                     |
| <i>β</i> /°                                                  | 101.129(5)                                                                          | 102.5590(10)                                                                     | 99.78(2)                                                                         | 97.1030(10)                                                                     |
| <i>γ</i> /°                                                  | 106.111(5)                                                                          | 90                                                                               | 90                                                                               | 102.3720(10)                                                                    |
| <i>V</i> /Å <sup>3</sup>                                     | 4353.1(15)                                                                          | 4467.6(4)                                                                        | 4946(7)                                                                          | 2465.82(10)                                                                     |
| <i>Z</i>                                                     | 4                                                                                   | 4                                                                                | 4                                                                                | 2                                                                               |
| $\rho_{\text{calc}}$ /cm <sup>3</sup>                        | 1.313                                                                               | 1.413                                                                            | 1.222                                                                            | 1.339                                                                           |
| $\mu$ /mm <sup>-1</sup>                                      | 0.688                                                                               | 0.621                                                                            | 0.558                                                                            | 0.565                                                                           |
| <i>F</i> (000)                                               | 1764.0                                                                              | 1960.0                                                                           | 1872.0                                                                           | 1024.0                                                                          |
| Crystal size/mm <sup>3</sup>                                 | 0.38 × 0.25 × 0.03                                                                  | 0.24 × 0.08 × 0.01                                                               | 0.24 × 0.18 × 0.1                                                                | 0.24 × 0.16 × 0.12                                                              |
| Radiation                                                    | MoK $\alpha$ ( $\lambda$ = 0.71073)                                                 | MoK $\alpha$ ( $\lambda$ = 0.71073)                                              | MoK $\alpha$ ( $\lambda$ = 0.71073)                                              | MoK $\alpha$ ( $\lambda$ = 0.71073)                                             |
| 2 $\theta$ range for data collection/°                       | 2.58 to 52                                                                          | 4.006 to 51.998                                                                  | 2.932 to 59.358                                                                  | 4.144 to 51.998                                                                 |
| Reflections collected                                        | 52861                                                                               | 43794                                                                            | 60866                                                                            | 25932                                                                           |
| Independent reflections                                      | 17075 [ <i>R</i> <sub>int</sub> = 0.0832, <i>R</i> <sub>sigma</sub> = 0.1232]       | 8785 [ <i>R</i> <sub>int</sub> = 0.0663, <i>R</i> <sub>sigma</sub> = 0.0484]     | 13930 [ <i>R</i> <sub>int</sub> = 0.0849, <i>R</i> <sub>sigma</sub> = 0.1246]    | 9672 [ <i>R</i> <sub>int</sub> = 0.0369, <i>R</i> <sub>sigma</sub> = 0.0472]    |
| Data/restraints/parameters                                   | 17075/81/1034                                                                       | 8785/0/588                                                                       | 13930/0/586                                                                      | 9672/0/626                                                                      |
| Goodness-of-fit on <i>F</i> <sup>2</sup>                     | 1.046                                                                               | 1.014                                                                            | 1.088                                                                            | 1.024                                                                           |
| Final <i>R</i> indexes [ <i>I</i> ≥ 2 $\sigma$ ( <i>I</i> )] | <i>R</i> <sub>1</sub> = 0.0590, <i>wR</i> <sub>2</sub> = 0.1412                     | <i>R</i> <sub>1</sub> = 0.0417, <i>wR</i> <sub>2</sub> = 0.0940                  | <i>R</i> <sub>1</sub> = 0.0543, <i>wR</i> <sub>2</sub> = 0.1439                  | <i>R</i> <sub>1</sub> = 0.0432, <i>wR</i> <sub>2</sub> = 0.1086                 |
| Final <i>R</i> indexes [all data]                            | <i>R</i> <sub>1</sub> = 0.0976, <i>wR</i> <sub>2</sub> = 0.1574                     | <i>R</i> <sub>1</sub> = 0.0652, <i>wR</i> <sub>2</sub> = 0.1077                  | <i>R</i> <sub>1</sub> = 0.0960, <i>wR</i> <sub>2</sub> = 0.1579                  | <i>R</i> <sub>1</sub> = 0.0538, <i>wR</i> <sub>2</sub> = 0.1150                 |
| Largest diff. peak/hole / e Å <sup>-3</sup>                  | 1.42/-0.59                                                                          | 0.69/-0.28                                                                       | 0.71/-0.43                                                                       | 0.71/-0.43                                                                      |

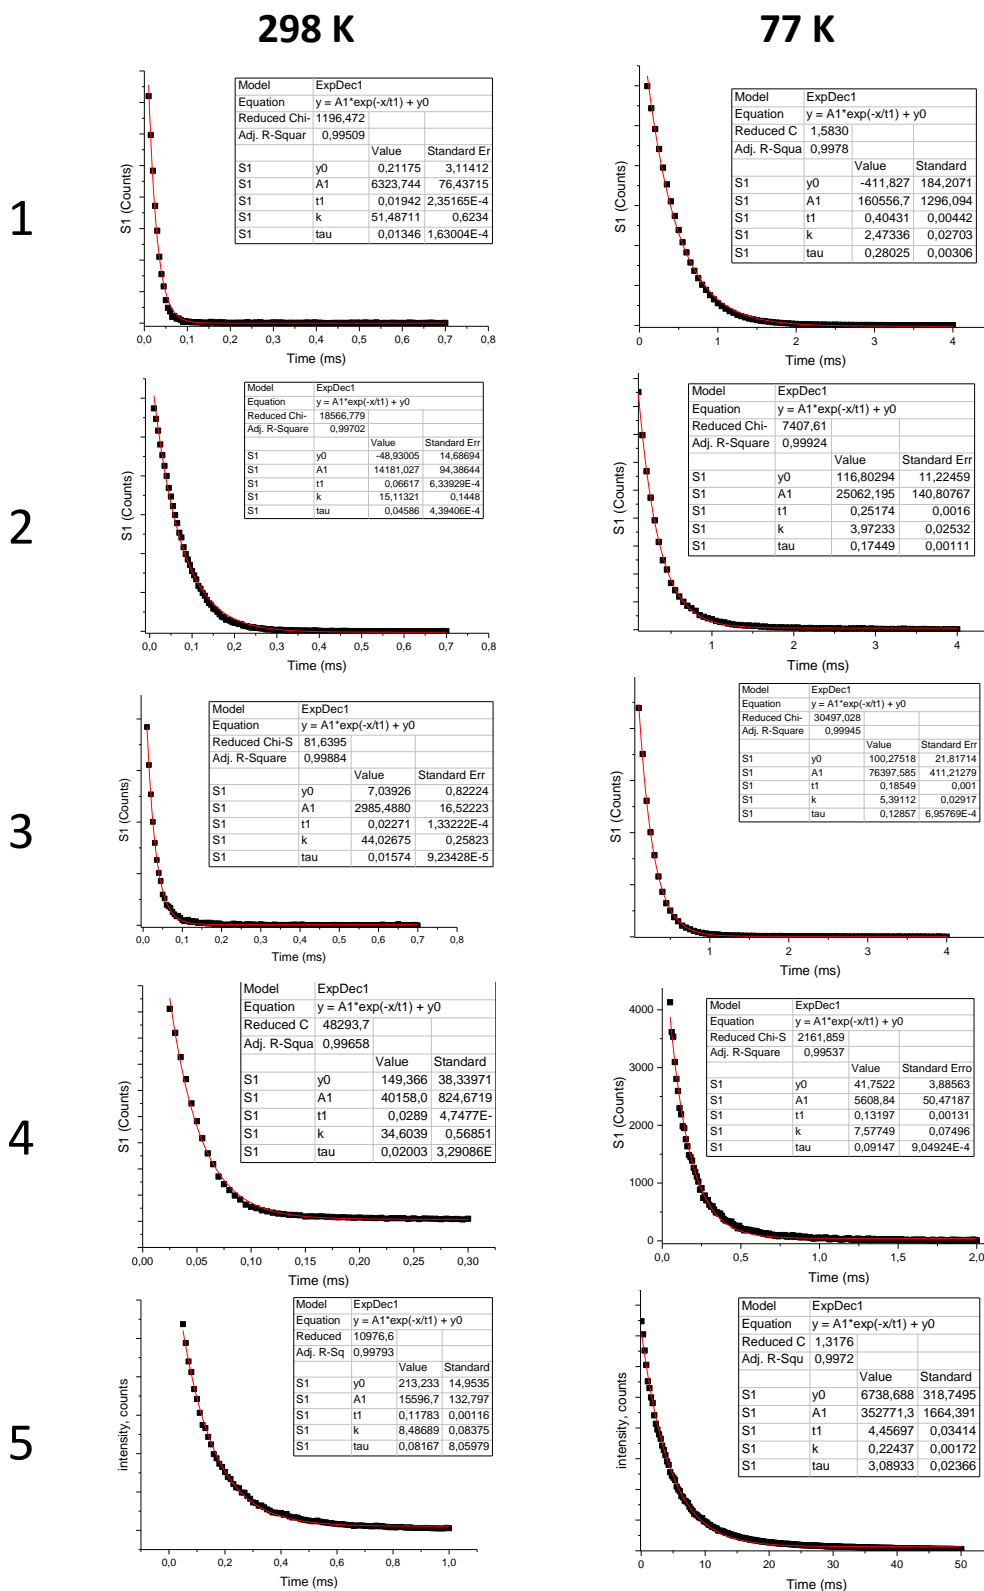

Figure S1. Phosphorescence decays of complexes **1-5** in the solid state at 298 K and 77 K.

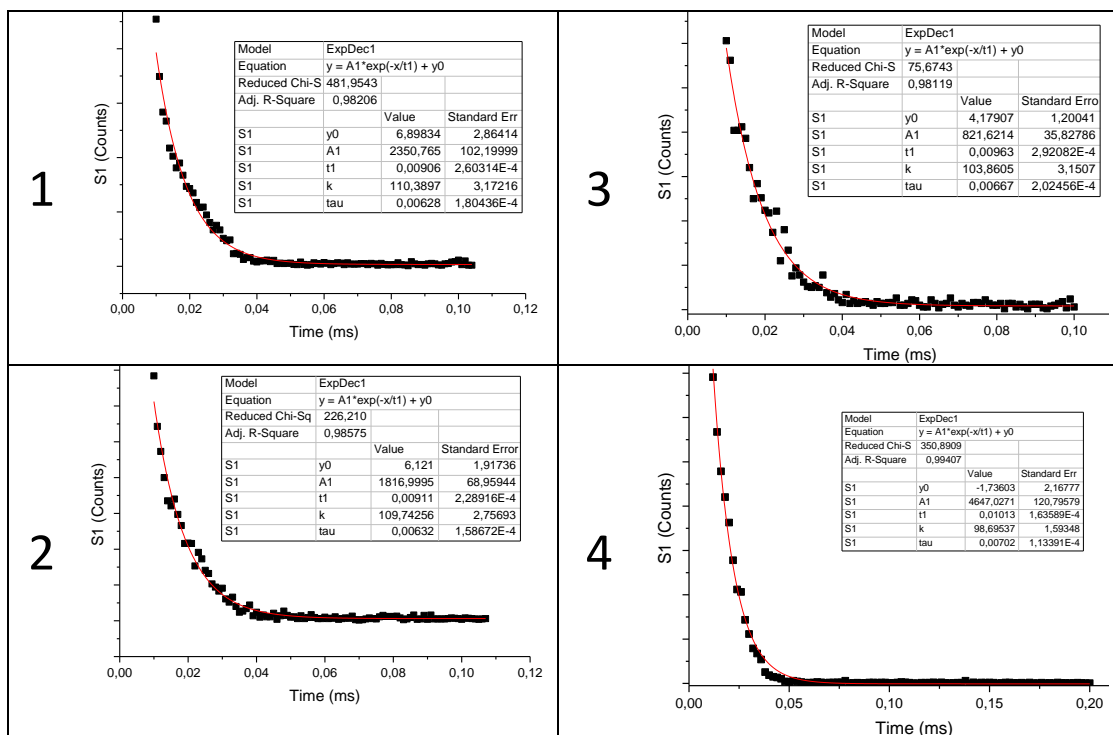

Figure S2. Phosphorescence decays of complexes **1-4** in deoxygenated DCE solution at 298 K.

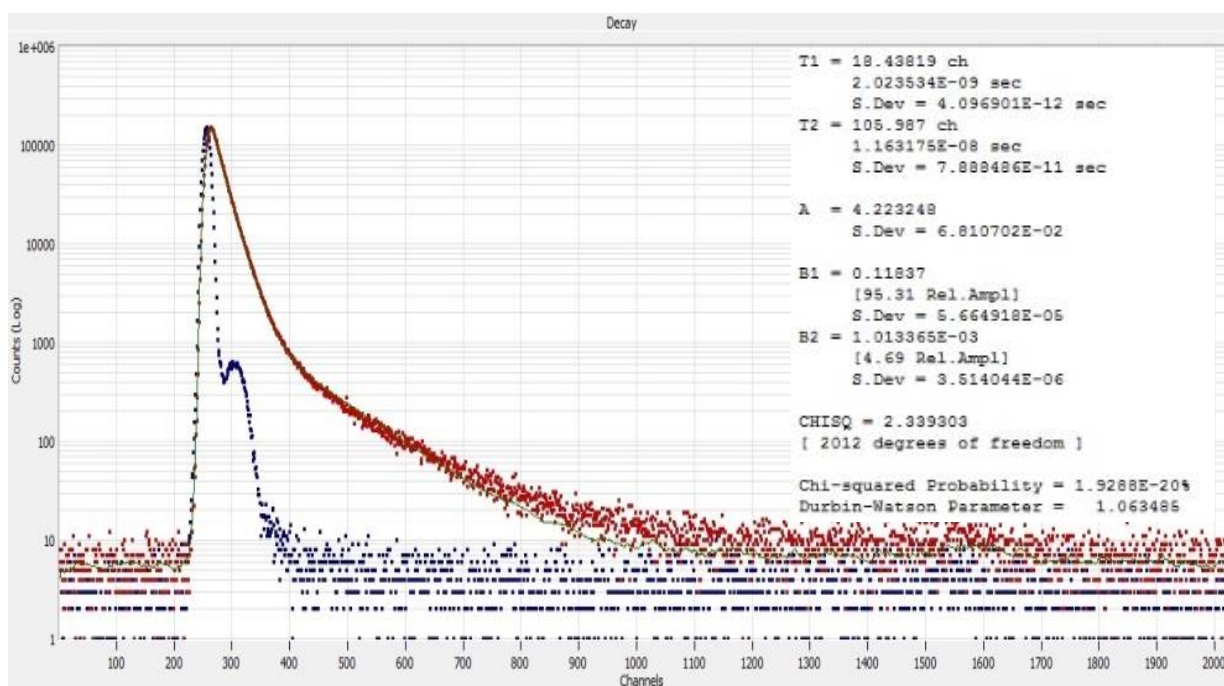

Figure S3. Fluorescence decay of complex **5** in the DCE solution at 298 K. Brown – sample, blue – prompt.

Table S2. Angles of DFT and TDDFT optimized complexes.

|                        | 3   |                   |                  |                | 2   |                   |                  |                | 5   |                  |                | 1   |                  |                |
|------------------------|-----|-------------------|------------------|----------------|-----|-------------------|------------------|----------------|-----|------------------|----------------|-----|------------------|----------------|
|                        | GS  | T <sup>tetr</sup> | T <sup>Pyr</sup> | S <sub>1</sub> | GS  | T <sup>tetr</sup> | T <sup>Pyr</sup> | S <sub>1</sub> | GS  | T <sup>Pyr</sup> | S <sub>1</sub> | GS  | T <sup>Pyr</sup> | S <sub>1</sub> |
| P-Cu-P                 | 114 | 113               | 99               | 97             | 114 | 112               | 103              | 101            | 100 | 92               | 92             | 89  | 80               | 80             |
| N-Cu-N                 | 77  | 77                | 80               | 80             | 77  | 76                | 81               | 81             | 76  | 82               | 81             | 78  | 80               | 80             |
| N <sup>Pz</sup> -Cu-P1 | 117 | 104               | 91               | 89             | 118 | 115               | 97               | 95             | 126 | 104              | 103            | 133 | 93               | 93             |
| N <sup>Pz</sup> -Cu-P2 | 123 | 141               | 166              | 171            | 121 | 129               | 158              | 163            | 127 | 156              | 161            | 134 | 168              | 167            |
| N <sup>Py</sup> -Cu-P1 | 114 | 105               | 127              | 125            | 111 | 108               | 112              | 108            | 124 | 130              | 126            | 108 | 149              | 151            |
| N <sup>Py</sup> -Cu-P2 | 102 | 104               | 101              | 101            | 108 | 105               | 102              | 102            | 99  | 101              | 101            | 107 | 101              | 101            |

Table S3. The hole-electron analysis of 10 lowest S<sub>0</sub>-S<sub>x</sub> transitions. The impacts of fragments to the ground and excited states are shown in percents.

| 1     |       |       |       |              |    |        |      |     |                |    |        |      |     |  |
|-------|-------|-------|-------|--------------|----|--------|------|-----|----------------|----|--------|------|-----|--|
| state | E, eV | λ, nm | f     | Ground state |    |        |      |     | Excited state: |    |        |      |     |  |
|       |       |       |       | Cu           | P2 | ligand | PhPz | BF4 | Cu             | P2 | ligand | PhPz | BF4 |  |
| S1    | 3.752 | 330   | 0.102 | 50           | 26 | 13     | 11   | 0   | 2              | 1  | 4      | 93   | 0   |  |
| S2    | 3.873 | 320   | 0.001 | 63           | 4  | 2      | 31   | 1   | 2              | 1  | 2      | 95   | 0   |  |
| S3    | 4.098 | 303   | 0.005 | 41           | 34 | 20     | 4    | 0   | 6              | 26 | 66     | 2    | 0   |  |
| S4    | 4.184 | 296   | 0.016 | 35           | 39 | 22     | 4    | 0   | 0              | 14 | 84     | 2    | 0   |  |
| S5    | 4.566 | 272   | 0.009 | 46           | 28 | 15     | 10   | 0   | 0              | 1  | 8      | 91   | 0   |  |
| S6    | 4.694 | 264   | 0.192 | 43           | 29 | 21     | 7    | 0   | 5              | 26 | 55     | 14   | 0   |  |
| S7    | 4.748 | 261   | 0.059 | 53           | 11 | 8      | 27   | 1   | 1              | 7  | 22     | 70   | 0   |  |
| S8    | 4.752 | 261   | 0.093 | 50           | 20 | 16     | 13   | 1   | 3              | 15 | 58     | 24   | 0   |  |
| S9    | 4.793 | 259   | 0.012 | 79           | 6  | 6      | 9    | 0   | 2              | 2  | 4      | 93   | 0   |  |
| S10   | 4.798 | 258   | 0.018 | 33           | 34 | 29     | 4    | 0   | 1              | 2  | 96     | 1    | 0   |  |

  

| 2     |       |       |       |              |    |        |      |     |                |    |        |      |     |  |
|-------|-------|-------|-------|--------------|----|--------|------|-----|----------------|----|--------|------|-----|--|
| state | E, eV | λ, nm | f     | Ground state |    |        |      |     | Excited state: |    |        |      |     |  |
|       |       |       |       | Cu           | P2 | ligand | PhPz | BF4 | Cu             | P2 | ligand | PhPz | BF4 |  |
| S1    | 3.872 | 320   | 0.109 | 50           | 23 | 12     | 15   | 0   | 2              | 1  | 1      | 96   | 0   |  |
| S2    | 3.961 | 313   | 0.002 | 65           | 2  | 2      | 30   | 0   | 2              | 1  | 1      | 96   | 0   |  |
| S3    | 4.333 | 286   | 0.006 | 72           | 10 | 9      | 9    | 0   | 2              | 1  | 1      | 96   | 0   |  |
| S4    | 4.555 | 272   | 0.003 | 37           | 31 | 28     | 5    | 0   | 5              | 19 | 73     | 2    | 0   |  |
| S5    | 4.632 | 268   | 0.009 | 45           | 22 | 13     | 20   | 0   | 0              | 0  | 2      | 97   | 0   |  |
| S6    | 4.765 | 260   | 0.057 | 33           | 27 | 26     | 14   | 0   | 1              | 13 | 68     | 17   | 0   |  |
| S7    | 4.813 | 258   | 0.003 | 55           | 3  | 3      | 38   | 0   | 0              | 0  | 1      | 99   | 0   |  |
| S8    | 4.843 | 256   | 0.118 | 43           | 9  | 8      | 40   | 0   | 2              | 3  | 15     | 81   | 0   |  |
| S9    | 4.991 | 248   | 0.029 | 30           | 11 | 48     | 11   | 0   | 1              | 6  | 66     | 27   | 0   |  |
| S10   | 5.007 | 248   | 0.007 | 71           | 3  | 22     | 3    | 0   | 2              | 2  | 26     | 70   | 0   |  |

  

| 3     |       |       |       |              |    |        |      |     |                |    |        |      |     |  |
|-------|-------|-------|-------|--------------|----|--------|------|-----|----------------|----|--------|------|-----|--|
| state | E, eV | λ, nm | f     | Ground state |    |        |      |     | Excited state: |    |        |      |     |  |
|       |       |       |       | Cu           | P2 | ligand | PhPz | BF4 | Cu             | P2 | ligand | PhPz | BF4 |  |
| S1    | 3.606 | 344   | 0.092 | 53           | 19 | 10     | 18   | 0   | 2              | 1  | 1      | 95   | 0   |  |
| S2    | 4.073 | 304   | 0.026 | 65           | 9  | 7      | 20   | 0   | 2              | 1  | 1      | 95   | 0   |  |
| S3    | 4.314 | 287   | 0.008 | 71           | 11 | 9      | 9    | 0   | 2              | 1  | 3      | 94   | 0   |  |
| S4    | 4.341 | 286   | 0.001 | 52           | 20 | 13     | 15   | 0   | 1              | 3  | 11     | 84   | 0   |  |
| S5    | 4.517 | 275   | 0.025 | 40           | 28 | 23     | 8    | 0   | 4              | 18 | 61     | 17   | 0   |  |
| S6    | 4.730 | 262   | 0.105 | 31           | 30 | 34     | 5    | 0   | 1              | 13 | 85     | 1    | 0   |  |
| S7    | 4.804 | 258   | 0.002 | 60           | 5  | 5      | 29   | 0   | 2              | 3  | 10     | 85   | 0   |  |
| S8    | 4.874 | 254   | 0.156 | 40           | 27 | 26     | 7    | 0   | 1              | 15 | 69     | 16   | 0   |  |
| S9    | 4.907 | 253   | 0.003 | 64           | 7  | 6      | 23   | 0   | 1              | 1  | 2      | 96   | 0   |  |

| S10   | 4.965 | 250            | 0.003 | 91           | 2  | 2      | 5    | 0   | 2              | 1  | 1      | 95   | 0   |
|-------|-------|----------------|-------|--------------|----|--------|------|-----|----------------|----|--------|------|-----|
| 5     |       |                |       |              |    |        |      |     |                |    |        |      |     |
| state | E, eV | $\lambda$ , nm | f     | Ground state |    |        |      |     | Excited state: |    |        |      |     |
|       |       |                |       | Cu           | P2 | ligand | PhPz | BF4 | Cu             | P2 | ligand | PhPz | BF4 |
| S1    | 3.696 | 335            | 0.138 | 54           | 24 | 9      | 13   | 0   | 2              | 1  | 4      | 93   | 0   |
| S2    | 3.958 | 313            | 0.013 | 65           | 5  | 4      | 25   | 1   | 2              | 1  | 6      | 91   | 0   |
| S3    | 4.067 | 305            | 0.026 | 39           | 30 | 26     | 5    | 0   | 2              | 10 | 75     | 13   | 0   |
| S4    | 4.241 | 292            | 0.052 | 19           | 8  | 70     | 2    | 0   | 2              | 5  | 83     | 10   | 0   |
| S5    | 4.397 | 282            | 0.018 | 28           | 17 | 50     | 5    | 0   | 1              | 3  | 58     | 38   | 0   |
| S6    | 4.422 | 280            | 0.009 | 66           | 9  | 18     | 7    | 0   | 2              | 2  | 11     | 86   | 0   |
| S7    | 4.432 | 280            | 0.013 | 35           | 17 | 41     | 7    | 0   | 1              | 2  | 48     | 49   | 0   |
| S8    | 4.503 | 275            | 0.004 | 4            | 3  | 92     | 1    | 0   | 1              | 3  | 94     | 2    | 0   |
| S9    | 4.541 | 273            | 0.007 | 12           | 8  | 79     | 1    | 0   | 1              | 3  | 96     | 1    | 0   |
| S10   | 4.619 | 268            | 0.015 | 23           | 15 | 57     | 4    | 0   | 1              | 7  | 85     | 6    | 0   |

Cu – copper atom, P2 – two P atoms, ligand – organic part of P<sup>+</sup>P ligand, PhPz – N<sup>+</sup>N ligand, BF4 – counterion. Color codes – green >90%, blue 30-90%

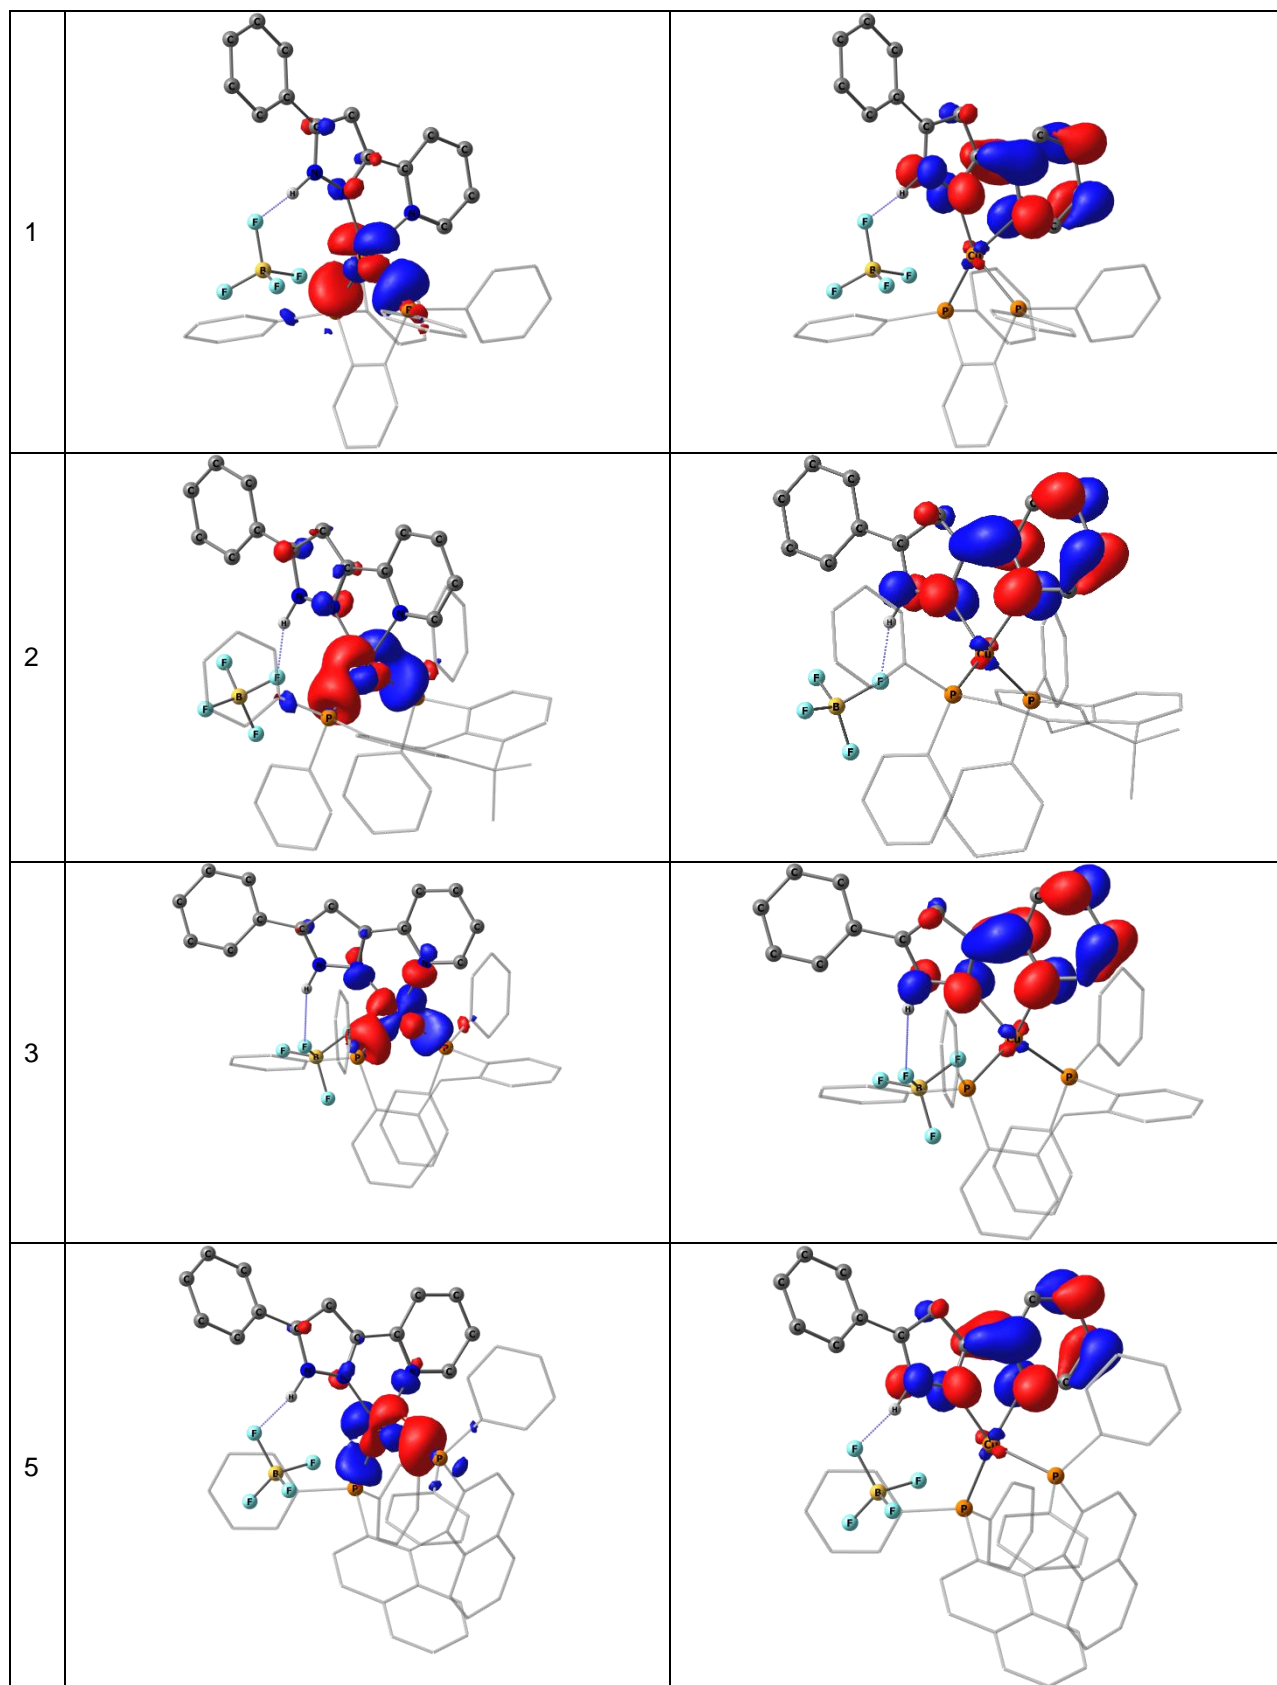

Figure S4. Natural transition orbitals (HONTO, left and LUNTO, right) for  $S_0 \rightarrow S_1$  transition of complexes **1-3, 5** as isosurfaces at 0.05 a.u. Hydrogen atoms are removed; C, O atoms of P<sup>Λ</sup>P ligands are shown as a wireframe.

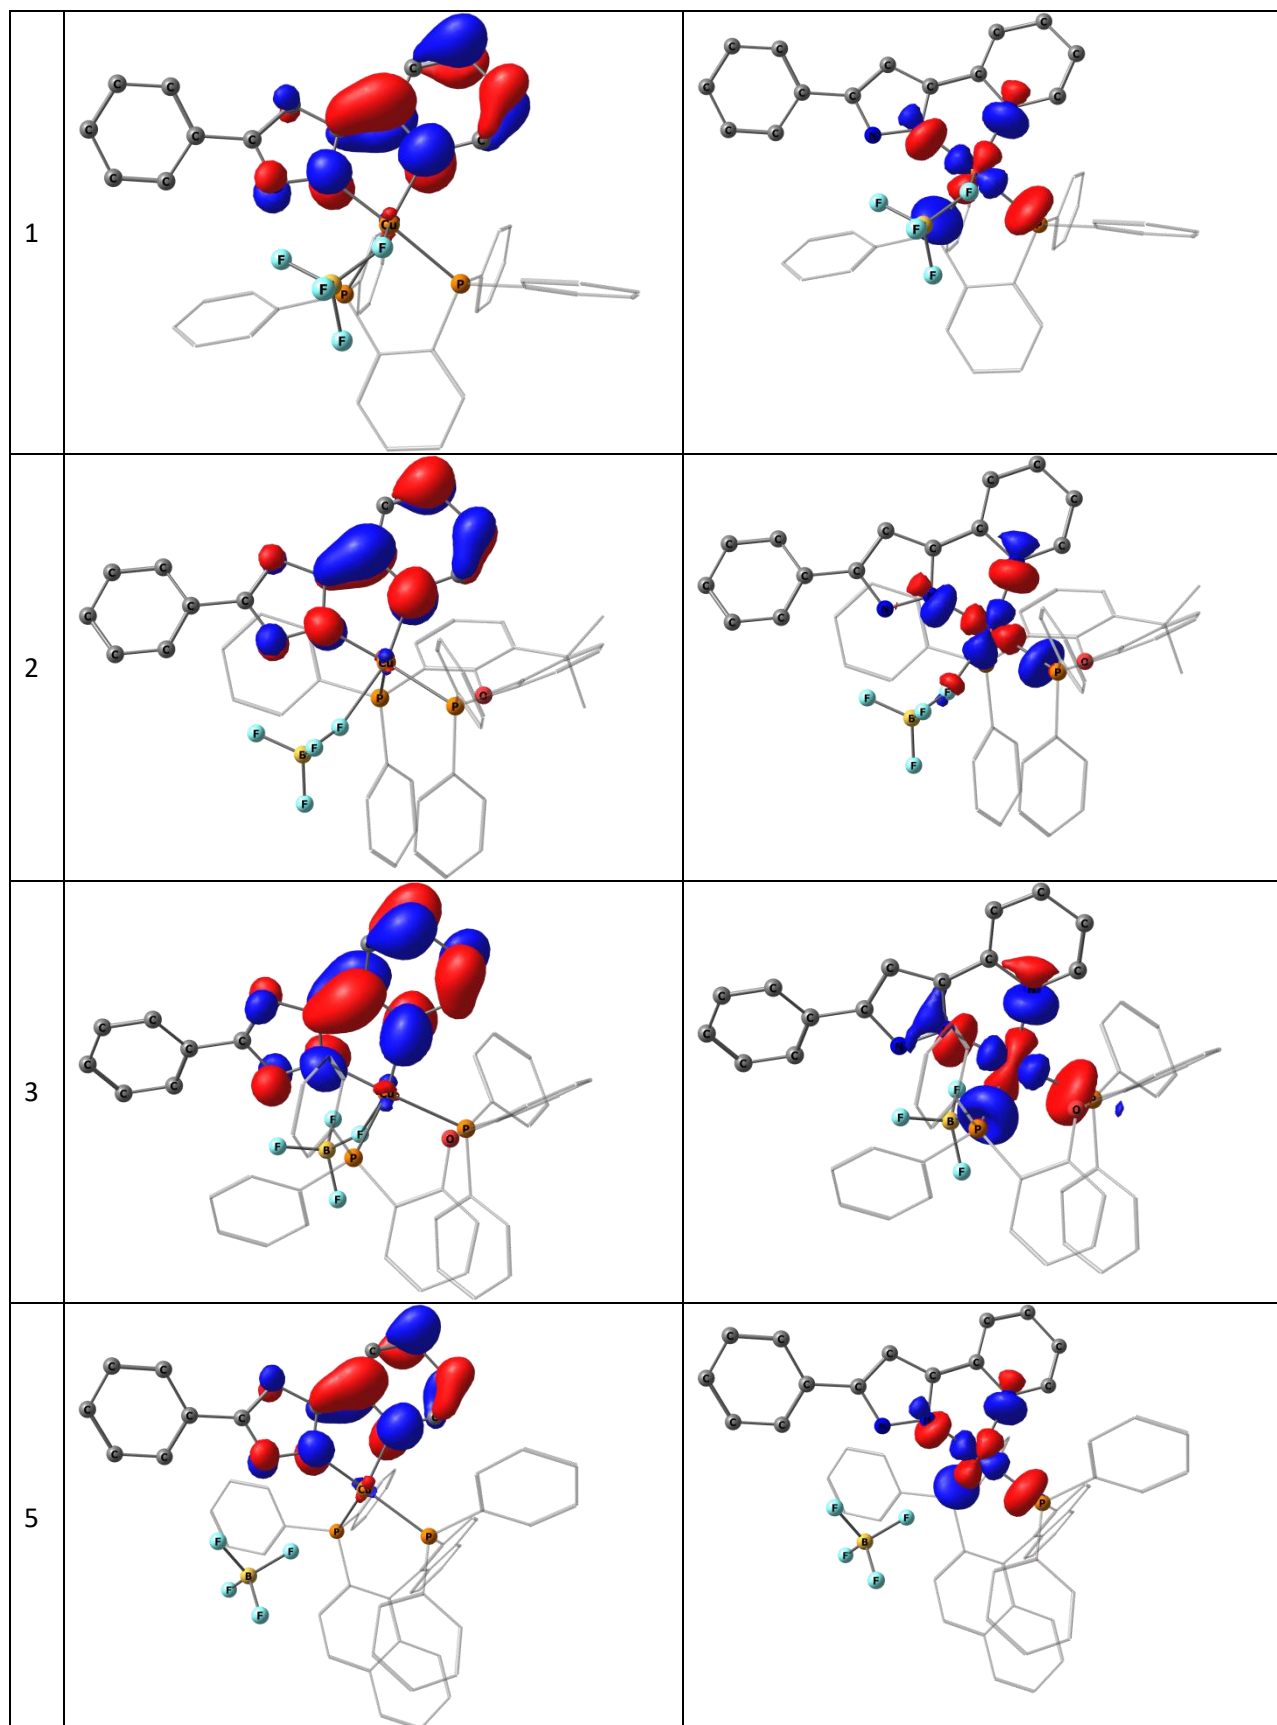

Figure S5. HSOMO (left) a HSOMO-1 (right) for restricted open-shell triplet state  $T^{DVR}$  of **1-3**, **5** as isosurface at 0.05 a.u. Hydrogen atoms are removed; C, O atoms of P<sup>^</sup>P ligands are shown as a wireframe.



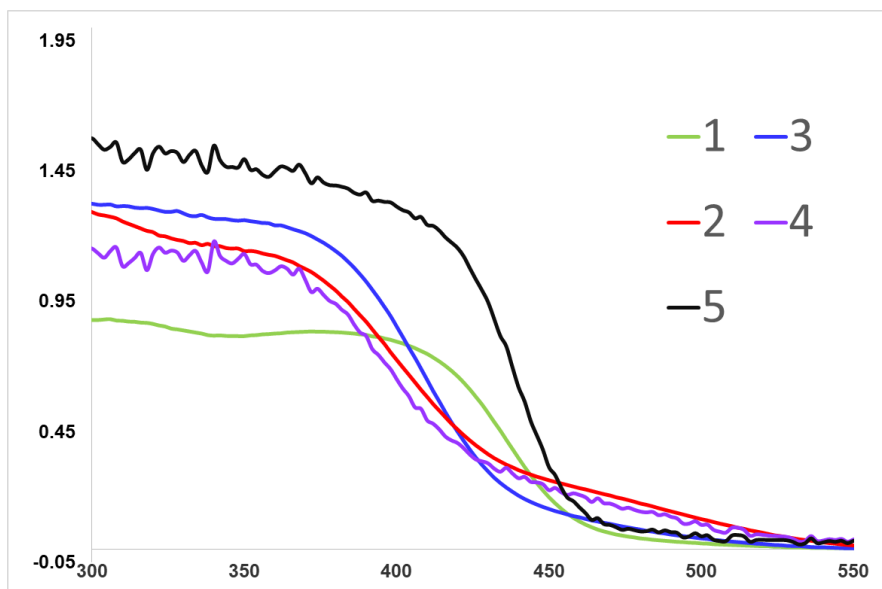

Figure S6. UV-vis spectra of complexes **1-5** in the solid state.

Table S4. The hole-electron analysis of 4 lowest spin forbidden  $S_0 \rightarrow T_x$  transitions. The impacts of fragments to the ground and excited states are shown in percents.

1

|    |       |                | Ground state (HOLE) |    |        |      |     | Excited state (ELECTRON) |    |        |      |     |
|----|-------|----------------|---------------------|----|--------|------|-----|--------------------------|----|--------|------|-----|
|    | E, eV | $\lambda$ , nm | Cu                  | P2 | ligand | PhPz | BF4 | Cu                       | P2 | ligand | PhPz | BF4 |
| T1 | 3.144 | 394            | 6                   | 2  | 0      | 92   | 0   | 1                        | 0  | 0      | 98   | 0   |
| T2 | 3.464 | 358            | 10                  | 14 | 75     | 1    | 0   | 2                        | 11 | 87     | 0    | 0   |
| T3 | 3.476 | 357            | 5                   | 2  | 1      | 92   | 0   | 0                        | 0  | 0      | 99   | 0   |
| T4 | 3.532 | 351            | 36                  | 18 | 14     | 32   | 0   | 2                        | 1  | 8      | 88   | 0   |

2

| state | E, eV | $\lambda$ , nm | Ground state (HOLE) |    |        |      |     | Excited state (ELECTRON) |    |        |      |     |
|-------|-------|----------------|---------------------|----|--------|------|-----|--------------------------|----|--------|------|-----|
|       |       |                | Cu                  | P2 | ligand | PhPz | BF4 | Cu                       | P2 | ligand | PhPz | BF4 |
| T1    | 3.146 | 394            | 4                   | 1  | 0      | 95   | 0   | 1                        | 0  | 0      | 99   | 0   |
| T2    | 3.466 | 358            | 2                   | 1  | -1     | 99   | 0   | 0                        | 0  | 0      | 99   | 0   |
| T3    | 3.538 | 350            | 25                  | 12 | 46     | 17   | 0   | 2                        | 3  | 43     | 53   | 0   |
| T4    | 3.542 | 350            | 17                  | 10 | 61     | 12   | 0   | 1                        | 3  | 60     | 35   | 0   |

3

|    | E, eV | $\lambda$ , nm | Ground state (HOLE) |    |        |      |     | Excited state (ELECTRON) |    |        |      |     |
|----|-------|----------------|---------------------|----|--------|------|-----|--------------------------|----|--------|------|-----|
|    |       |                | Cu                  | P2 | ligand | PhPz | BF4 | Cu                       | P2 | ligand | PhPz | BF4 |
| T1 | 3.188 | 389            | 32                  | 11 | 5      | 52   | 0   | 2                        | 1  | 0      | 97   | 0   |

|    |       |     |    |   |    |    |   |   |   |    |    |   |
|----|-------|-----|----|---|----|----|---|---|---|----|----|---|
| T2 | 3.349 | 370 | 22 | 7 | 3  | 69 | 0 | 1 | 1 | 0  | 98 | 0 |
| T3 | 3.530 | 351 | 4  | 1 | 9  | 86 | 0 | 0 | 1 | 11 | 88 | 0 |
| T4 | 3.535 | 351 | 2  | 4 | 79 | 16 | 0 | 1 | 4 | 79 | 16 | 0 |

5

|    | E, eV | $\lambda$ , nm | Ground state (HOLE) |    |        |      |     | Excited state (ELECTRON) |    |        |      |     |
|----|-------|----------------|---------------------|----|--------|------|-----|--------------------------|----|--------|------|-----|
|    |       |                | Cu                  | P2 | ligand | PhPz | BF4 | Cu                       | P2 | ligand | PhPz | BF4 |
| T1 | 2.585 | 480            | 1                   | 1  | 98     | 0    | 0   | 1                        | 2  | 97     | 0    | 0   |
| T2 | 2.629 | 472            | 0                   | 2  | 98     | 0    | 0   | 1                        | 2  | 98     | 0    | 0   |
| T3 | 3.177 | 390            | 9                   | 3  | 1      | 87   | 0   | 1                        | 1  | 1      | 98   | 0   |
| T4 | 3.412 | 363            | 45                  | 17 | 6      | 31   | 0   | 2                        | 1  | 1      | 95   | 0   |

Cu – copper atom, P2 – two P atoms, ligand – organic part of P<sup>^</sup>P ligand, PhPz – N<sup>^</sup>N ligand, BF<sub>4</sub> – counterion.

Color codes – green >90%, blue 30-90%

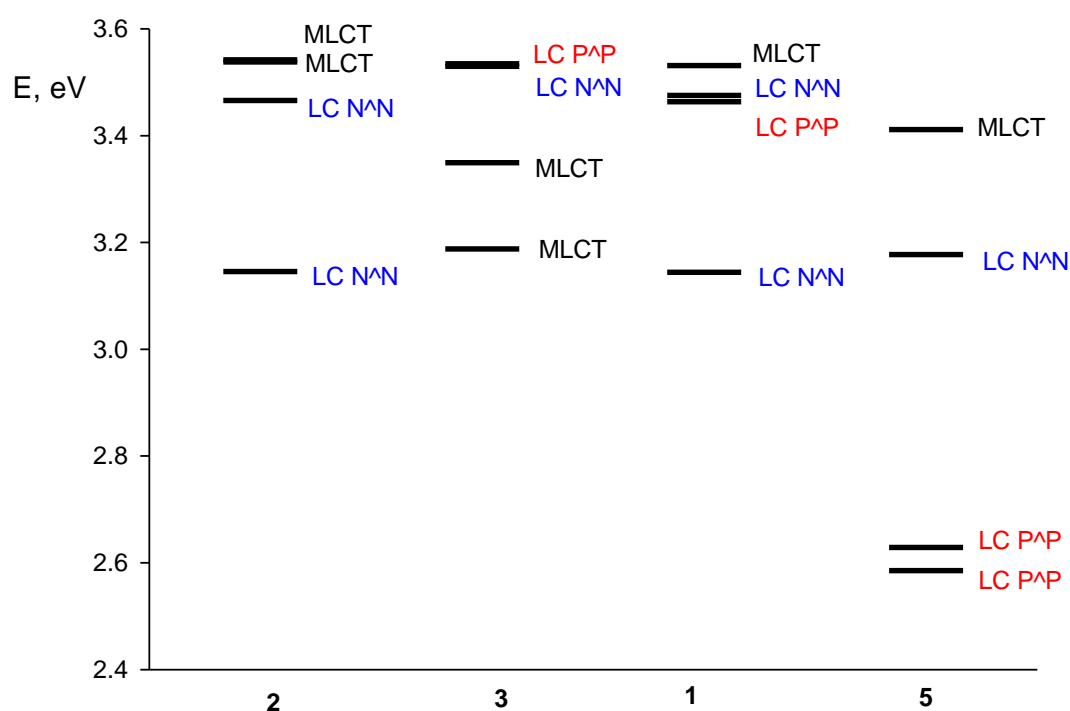

Figure S7. Graphical representation of energies of TDDFT computed spin forbidden  $S_0 \rightarrow T_x$  transitions for 1-3, 5. Black – MLCT states, red – P<sup>^</sup>P ligand centered states, blue N<sup>^</sup>N ligand centered states. Since excitation pathway is of MLCT nature the MLCT triplet state would be preferred until the alternative state becomes extremely profitable.

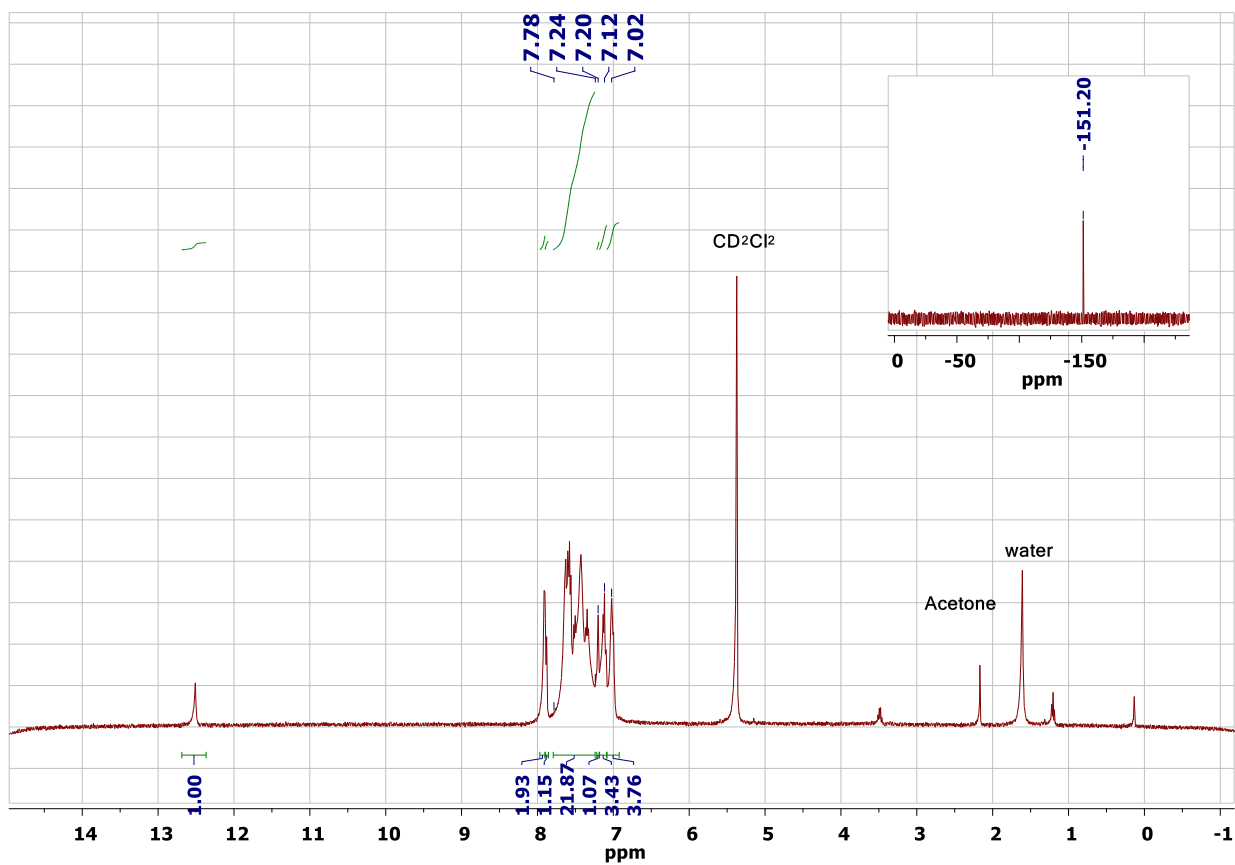

Figure S8.  $^1\text{H}$  NMR spectrum of complex **1** in  $\text{CD}_2\text{Cl}_2$ , inset  $^{19}\text{F}$  spectrum.

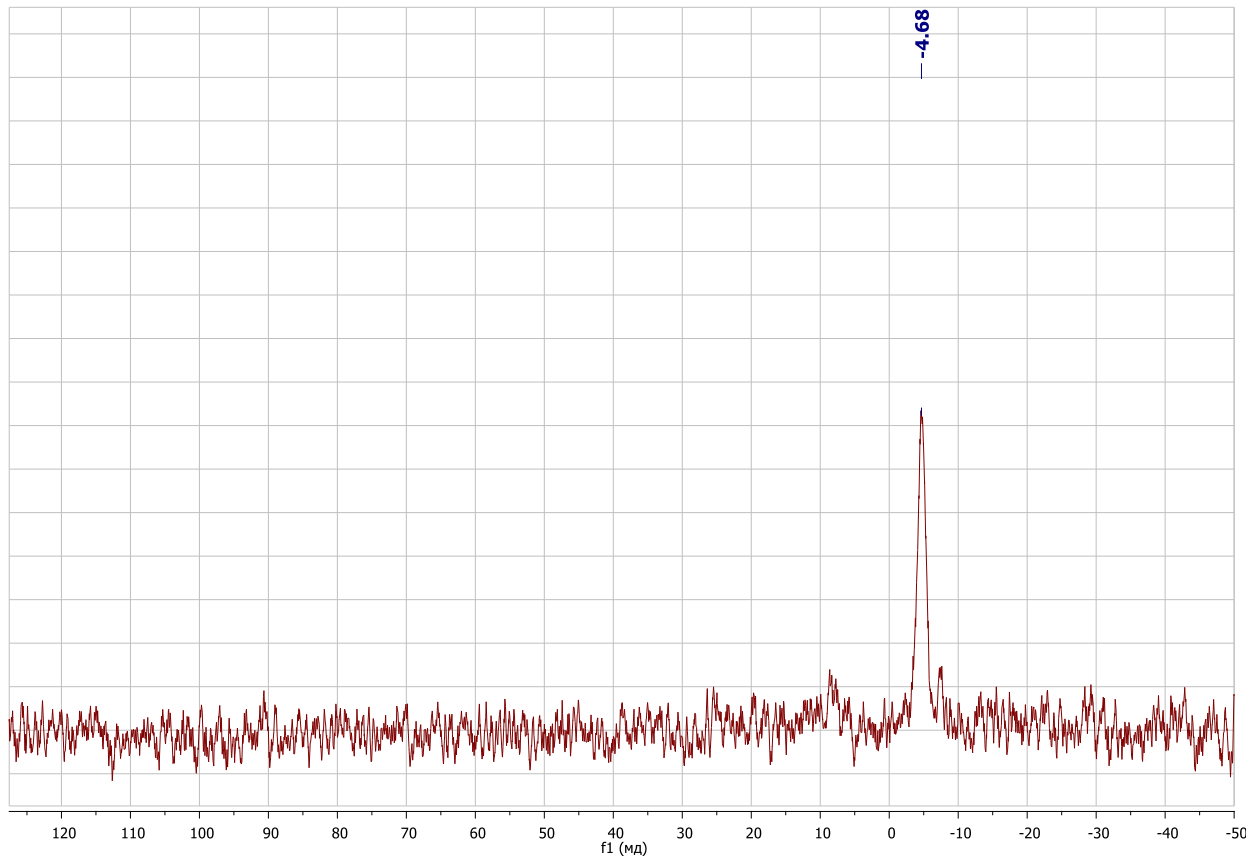

Figure S9.  $^{31}\text{P}\{^1\text{H}\}$  NMR spectrum of complex **1** in  $\text{CD}_2\text{Cl}_2$ .

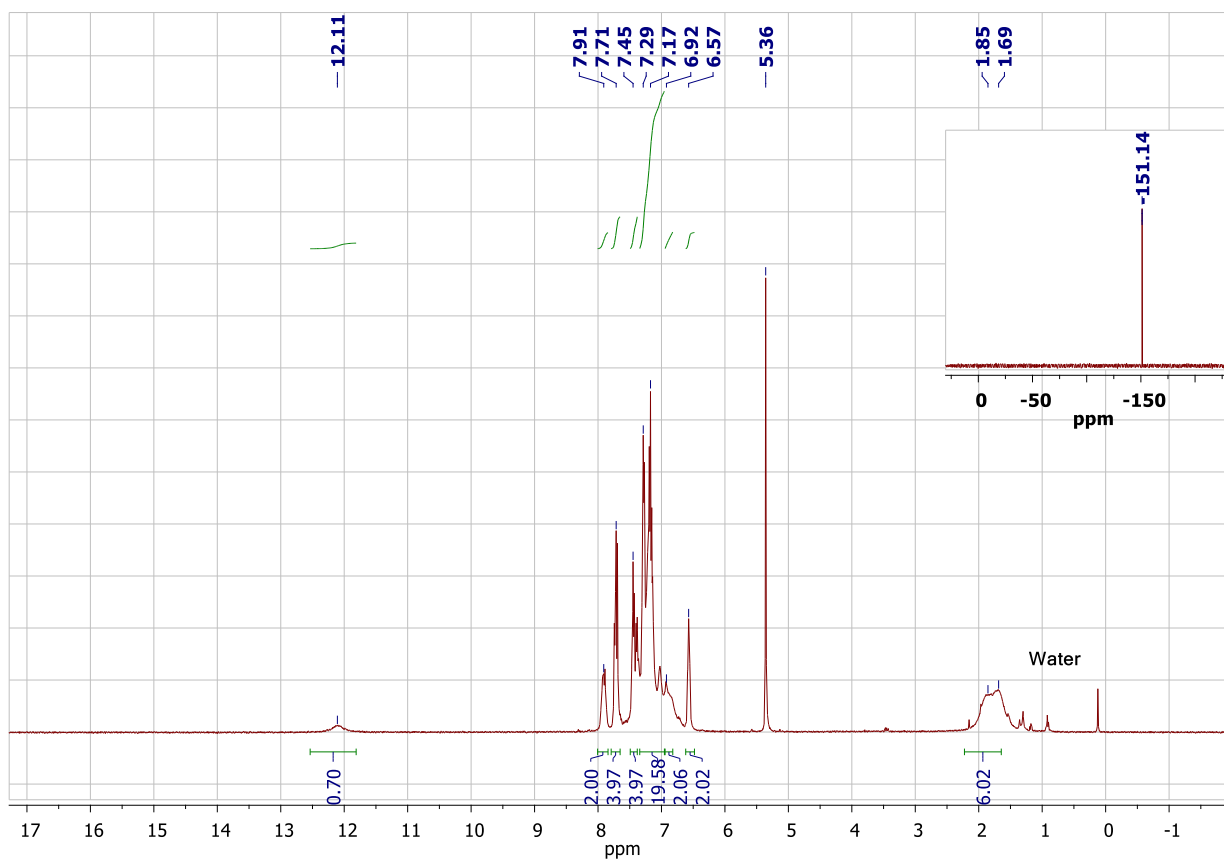

Figure S10.  $^1\text{H}$  NMR spectrum of complex **2** in  $\text{CD}_2\text{Cl}_2$ , inset  $^{19}\text{F}$  spectrum.

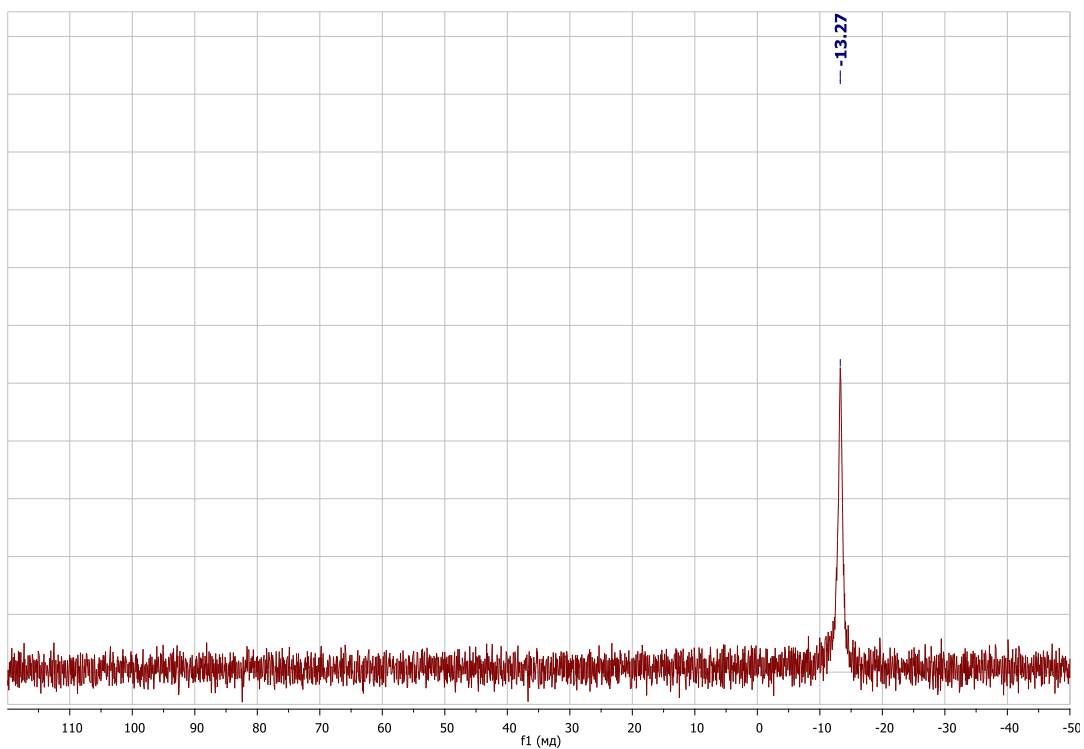

Figure S11.  $^{31}\text{P}\{^1\text{H}\}$  NMR spectrum of complex **2** in  $\text{CD}_2\text{Cl}_2$ .

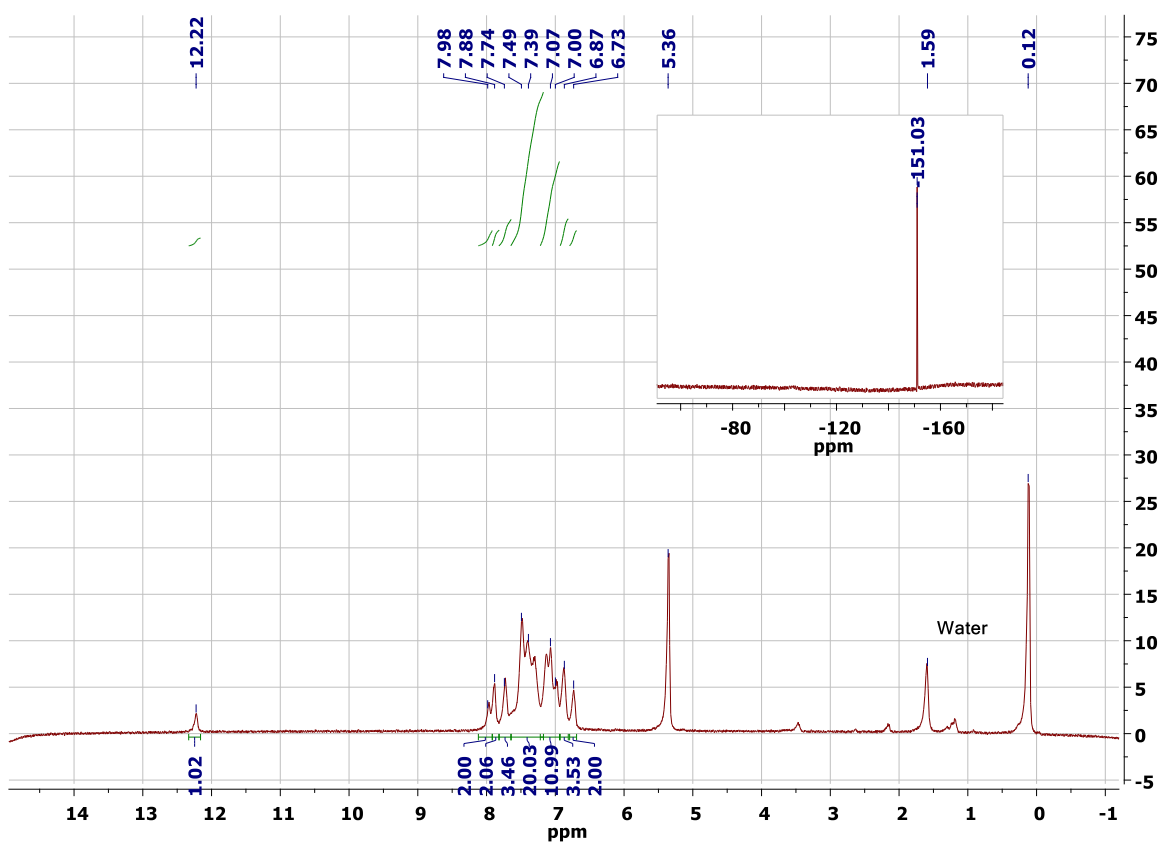

Figure S12.  $^1\text{H}$  NMR spectrum of complex **3** in  $\text{CD}_2\text{Cl}_2$ , inset  $^{19}\text{F}$  spectrum.

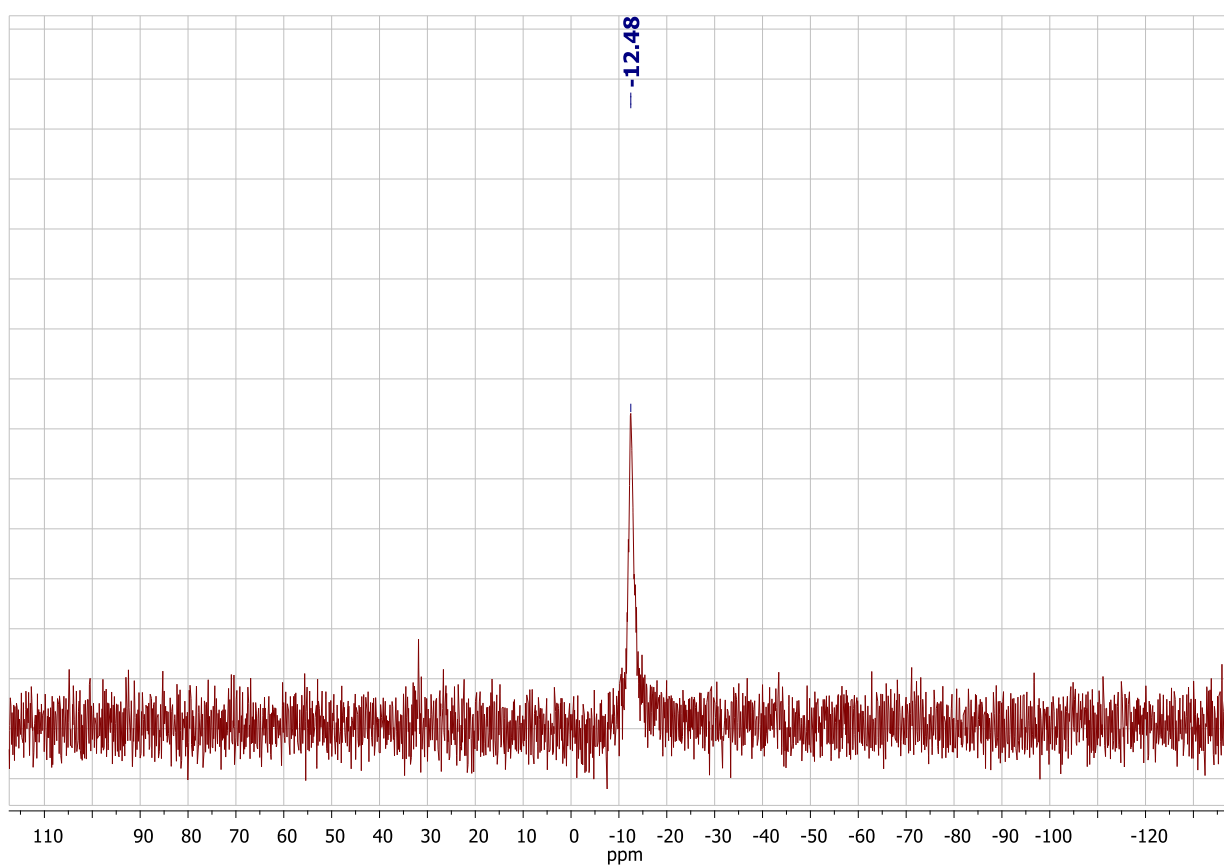

Figure S13.  $^{31}\text{P}\{^1\text{H}\}$  NMR spectrum of complex **3** in  $\text{CD}_2\text{Cl}_2$ .

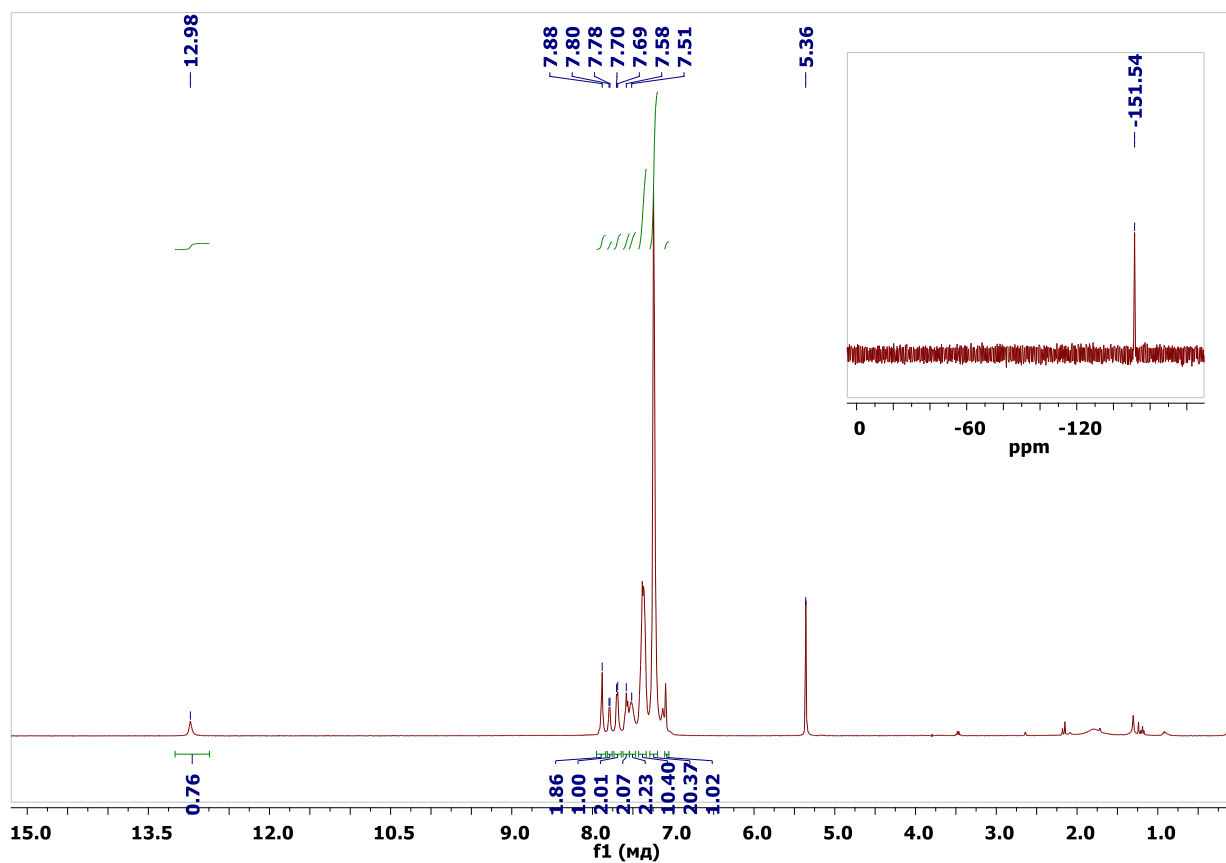

Figure S14.  $^1\text{H}$  NMR spectrum of complex **4** in  $\text{CD}_2\text{Cl}_2$ , inset  $^{19}\text{F}$  spectrum.

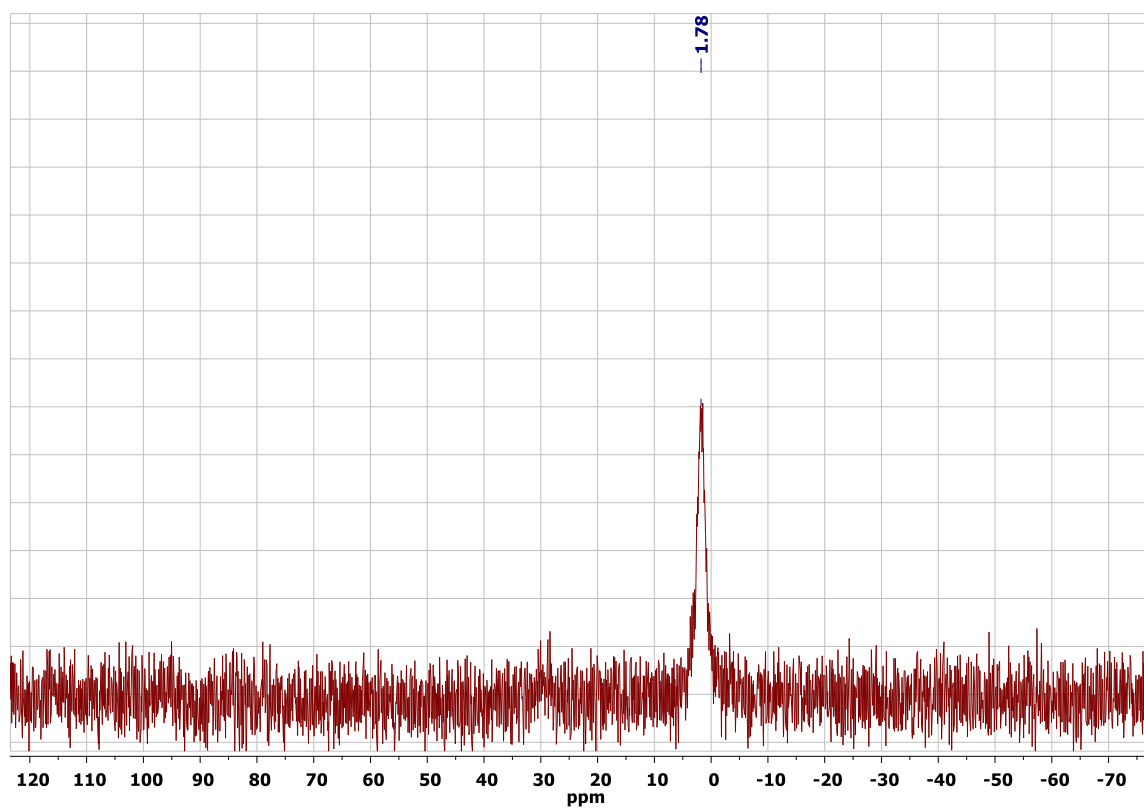

Figure S15.  $^{31}\text{P}\{^1\text{H}\}$  NMR spectrum of complex **4** in  $\text{CD}_2\text{Cl}_2$ .

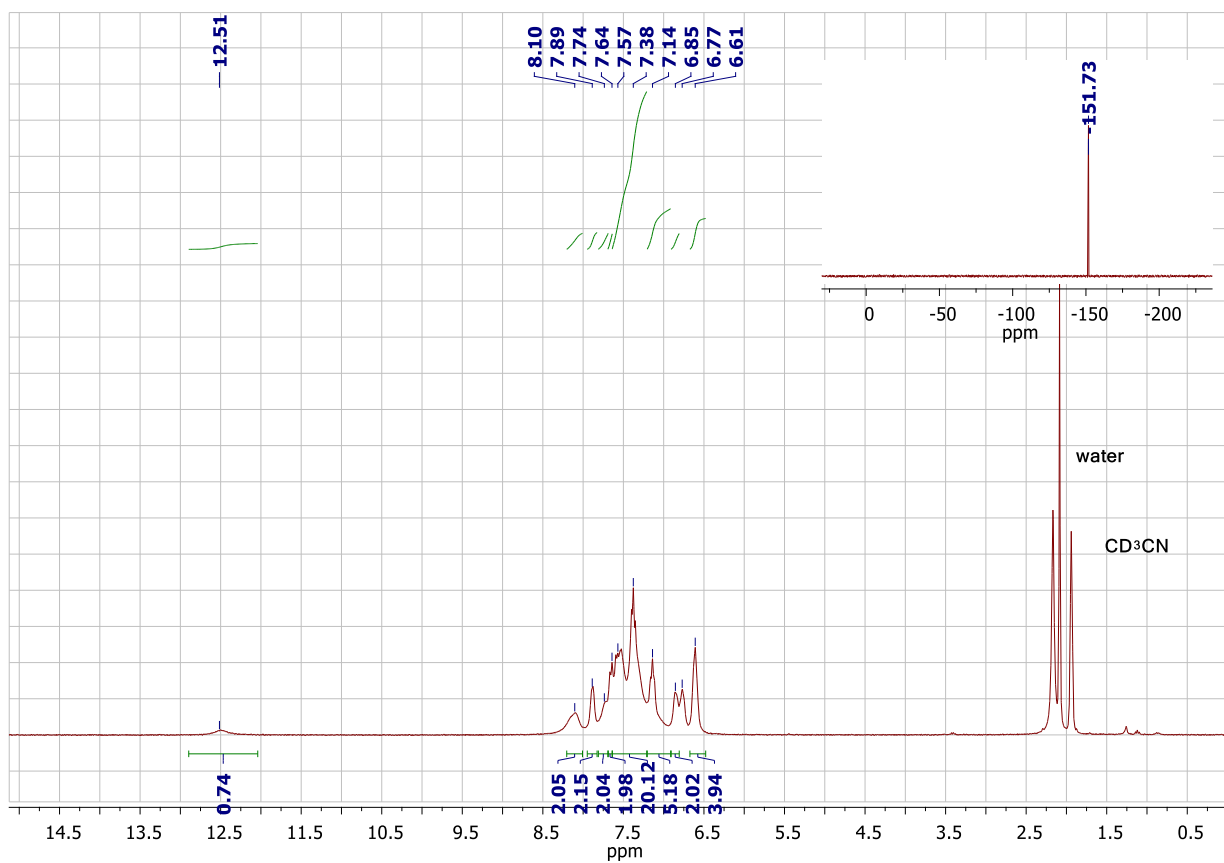

Figure S16.  $^1\text{H}$  NMR spectrum of complex **5** in  $\text{CD}_3\text{CN}$ , inset  $^{19}\text{F}$  spectrum.

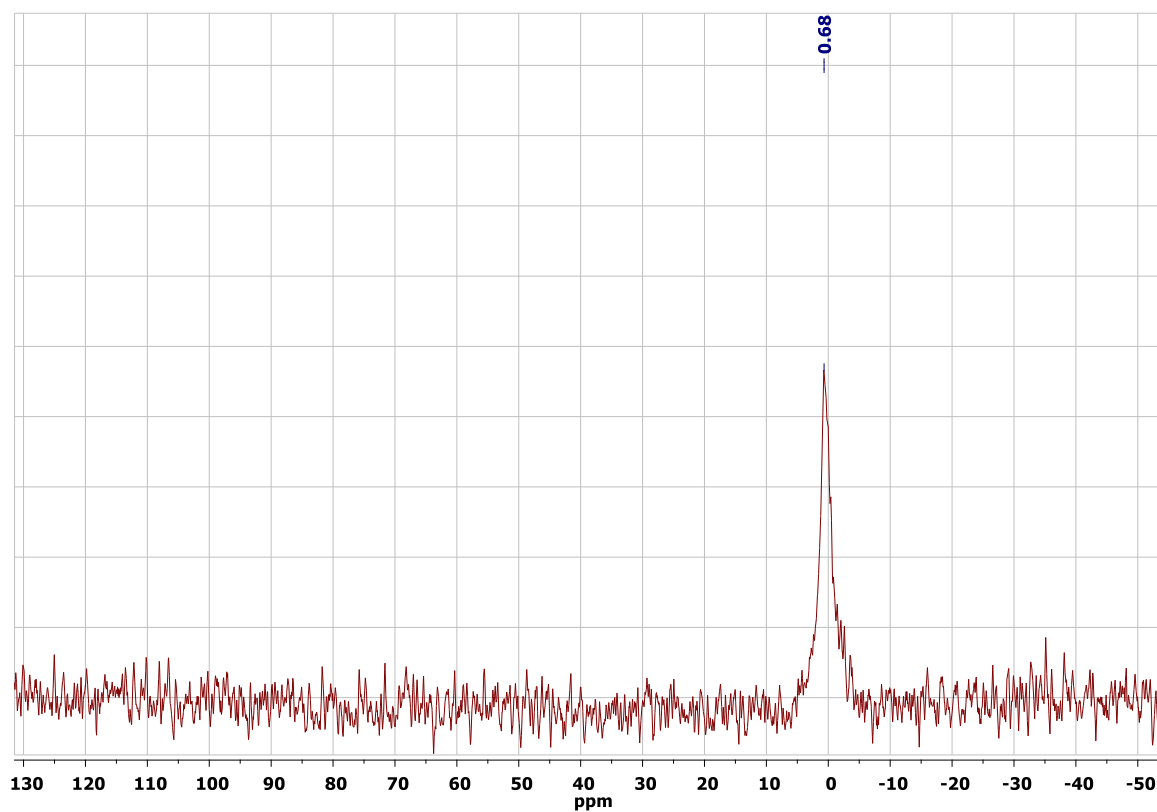

Figure S17.  $^{31}\text{P}\{^1\text{H}\}$  NMR spectrum of complex **4** in  $\text{CD}_2\text{Cl}_2$ .

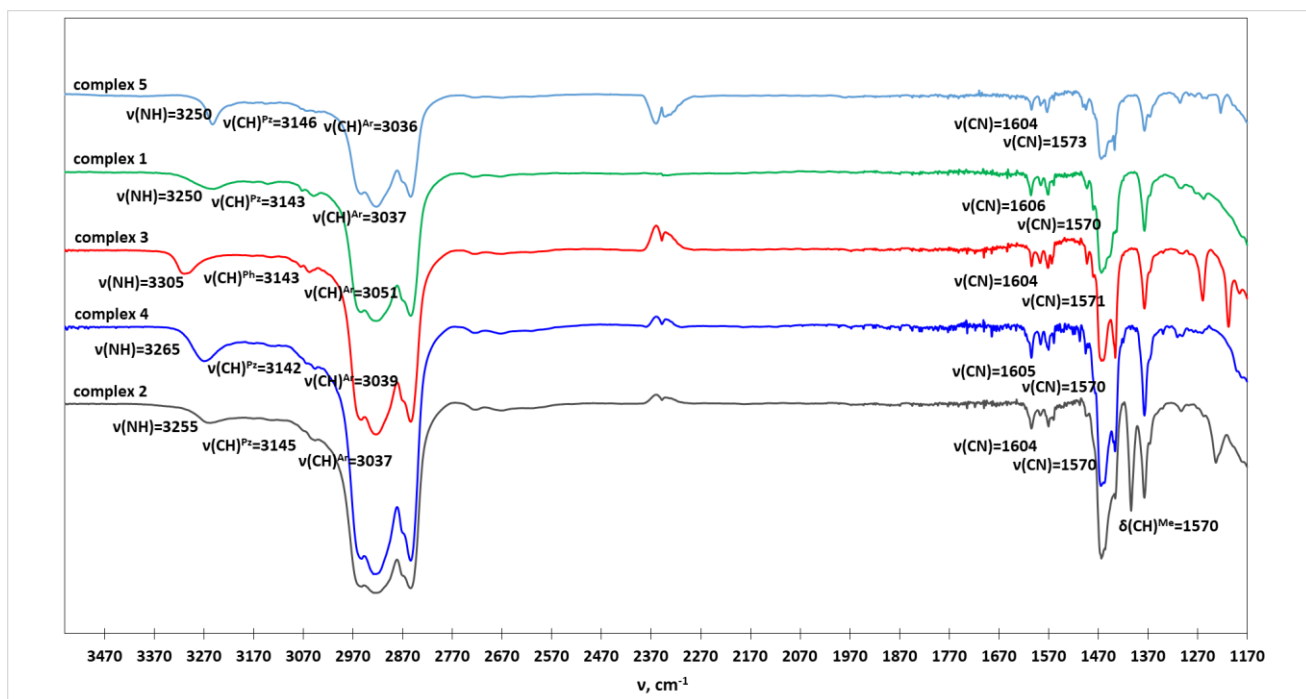

Figure S18. IR spectra of complexes in nujol.
